# Supplementary material for: Two hybrid polyoxometalate-pillared metal–organic frameworks
Source: Royal Society of Chemistry journal article supplement (doi:10.1039/c2dt30920c), 2012-01-01
Supplement: c2dt30920c.pdf [file c2dt30920c.pdf]

## Two novel POM-pillared metal-organic frameworks

Xiao-Yuan Wu<sup>a,b</sup>, Qi-Kai Zhang<sup>a,b</sup>, Xiao-Fei Kuang<sup>a,b</sup>, Wen-bin Yang<sup>a,b</sup>, Rong-Min Yu<sup>a,b</sup>, Can-Zhong Lu<sup>a,b</sup>\*

a. State Key Laboratory of Structural Chemistry, Fujian Institute of Research on the Structure of Matter, Chinese Academy of Sciences, Fuzhou, Fujian, 35002, China.

b. Key Laboratory of Coal to Ethylene Glycol and Its Related Technology, Fujian Institute of Research on the Structure of Matter, Chinese Academy of Sciences, Fuzhou, Fujian, 35002, China.

E-mail: czlu@fjirsm.ac.cn; Fax: (+86)- 591-83714946; Tel: (+86)- 591-83705794

**Table S1.** Crystal Data and Refinement Results for Compounds **1** and **2**

| Identification code                                 | <b>1</b>                                                                                          | <b>2</b>                                                                                                        |
|-----------------------------------------------------|---------------------------------------------------------------------------------------------------|-----------------------------------------------------------------------------------------------------------------|
| Empirical formula                                   | C <sub>36</sub> H <sub>40</sub> Cu <sub>5</sub> N <sub>30</sub> O <sub>48</sub> SiW <sub>12</sub> | C <sub>72</sub> H <sub>62</sub> Cu <sub>9</sub> Mo <sub>24</sub> N <sub>60</sub> O <sub>87</sub> P <sub>2</sub> |
| Formula weight                                      | 4212.97                                                                                           | 6096.18                                                                                                         |
| Crystal system                                      | Triclinic                                                                                         | Triclinic                                                                                                       |
| space group                                         | <i>P</i> -1                                                                                       | <i>P</i> -1                                                                                                     |
| <i>a</i> (Å)                                        | 12.195(10)                                                                                        | 13.4510(17)                                                                                                     |
| <i>b</i> (Å)                                        | 13.489(11)                                                                                        | 14.8499(19)                                                                                                     |
| <i>c</i> (Å)                                        | 14.276(12)                                                                                        | 21.992(2)                                                                                                       |
| $\alpha$ (°)                                        | 104.904(8)                                                                                        | 99.752(5)                                                                                                       |
| $\beta$ (°)                                         | 111.632(6)                                                                                        | 92.350(2)                                                                                                       |
| $\gamma$ (°)                                        | 105.607(2)                                                                                        | 116.253(4)                                                                                                      |
| Volume (Å <sup>3</sup> )                            | 1929(3)                                                                                           | 3849.2(8)                                                                                                       |
| <i>Z</i>                                            | 1                                                                                                 | 1                                                                                                               |
| Calculated density (Mg/m <sup>3</sup> )             | 3.627                                                                                             | 2.630                                                                                                           |
| Absorption coefficient (mm <sup>-1</sup> )          | 19.287                                                                                            | 3.229                                                                                                           |
| <i>F</i> (000)                                      | 1897                                                                                              | 2909                                                                                                            |
| Crystal size                                        | 0.20 × 0.20 × 0.20 mm                                                                             | 0.20 × 0.15 × 0.15 mm                                                                                           |
| $\theta$ range for data collection (°)              | 2.46 to 27.44                                                                                     | 2.00 to 27.48                                                                                                   |
| Limiting indices                                    | -12 ≤ <i>h</i> ≤ 15<br>-17 ≤ <i>k</i> ≤ 15<br>-18 ≤ <i>l</i> ≤ 18                                 | -17 ≤ <i>h</i> ≤ 17<br>-19 ≤ <i>k</i> ≤ 14<br>-26 ≤ <i>l</i> ≤ 28                                               |
| Reflections collected / unique                      | 14945 / 8720                                                                                      | 30390 / 17348                                                                                                   |
| Data / restraints / parameters                      | 8720 / 120 / 634                                                                                  | 17348 / 48 / 1198                                                                                               |
| Goodness-of-fit on <i>F</i> <sup>2</sup>            | 1.248                                                                                             | 1.085                                                                                                           |
| Final <i>R</i> indices [ <i>I</i> > 2σ( <i>I</i> )] | <i>R</i> <sub>1</sub> = 0.0940<br><i>wR</i> <sub>2</sub> = 0.1730                                 | <i>R</i> <sub>1</sub> = 0.0680<br><i>wR</i> <sub>2</sub> = 0.1774                                               |
| <i>R</i> indices (all data)                         | <i>R</i> <sub>1</sub> = 0.1111<br><i>wR</i> <sub>2</sub> = 0.1804                                 | <i>R</i> <sub>1</sub> = 0.0913<br><i>wR</i> <sub>2</sub> = 0.2050                                               |

**Table S2.** Selected Bond Distances for Compound **1**

| <b>Bond</b>  | <b>Distant (Å)</b> | <b>Bond</b>   | <b>Distant (Å)</b> | <b>Bond</b>  | <b>Distant (Å)</b> | <b>Bond</b>   | <b>Distant (Å)</b> |
|--------------|--------------------|---------------|--------------------|--------------|--------------------|---------------|--------------------|
| Si(1)-O(1)   | 1.59(3)            | W(2)-O(11A)   | 2.00(3)            | W(4)-O(17)   | 1.95(2)            | W(6)-O(4)     | 2.33(3)            |
| Si(1)-O(3)   | 1.61(3)            | W(2)-O(4)#1   | 2.33(3)            | W(4)-O(2)#1  | 2.28(3)            | W(6)-O(3)#1   | 2.46(3)            |
| Si(1)-O(2)   | 1.70(3)            | W(2)-O(1)     | 2.48(3)            | W(4)-O(1)    | 2.42(3)            | Cu(1)-N(2)    | 1.97(2)            |
| Si(1)-O(4)   | 1.71(3)            | W(3)-O(13)    | 1.66(2)            | W(5)-O(18)   | 1.70(2)            | Cu(1)-N(25)#2 | 1.98(2)            |
| W(1)-O(7)    | 1.70(2)            | W(3)-O(11B)#1 | 1.73(3)            | W(5)-O(5)    | 1.85(2)            | Cu(1)-N(29)   | 1.99(2)            |
| W(1)-O(12)#1 | 1.84(2)            | W(3)-O(15B)   | 1.84(4)            | W(5)-O(17)   | 1.87(2)            | Cu(1)-N(26)   | 2.02(2)            |
| W(1)-O(6)    | 1.86(2)            | W(3)-O(14)    | 1.91(2)            | W(5)-O(19)   | 1.89(2)            | Cu(1)-O(7)    | 2.44(2)            |
| W(1)-O(8)    | 1.87(2)            | W(3)-O(12)    | 1.93(2)            | W(5)-O(6)    | 1.91(2)            | Cu(2)-N(13)#3 | 1.97(2)            |
| W(1)-O(9)    | 1.89(2)            | W(3)-O(11A)#1 | 2.07(4)            | W(5)-O(3)#1  | 2.33(3)            | Cu(2)-OW1     | 1.98(2)            |
| W(1)-O(2)    | 2.37(3)            | W(3)-O(15A)   | 2.11(3)            | W(5)-O(1)    | 2.38(3)            | Cu(2)-N(12)   | 1.99(2)            |
| W(1)-O(3)#1  | 2.44(3)            | W(3)-O(4)     | 2.39(3)            | W(6)-O(20)   | 1.70(2)            | Cu(2)-N(22)   | 2.02(2)            |
| W(2)-O(21)   | 1.66(2)            | W(3)-O(2)#1   | 2.45(3)            | W(6)-O(15B)  | 1.88(4)            | Cu(2)-N(23)   | 2.27(2)            |
| W(2)-O(22)   | 1.87(2)            | W(4)-O(16)    | 1.66(2)            | W(6)-O(10)#1 | 1.89(2)            | Cu(3)-N(7)    | 2.01(2)            |
| W(2)-O(10)   | 1.87(2)            | W(4)-O(14)    | 1.89(2)            | W(6)-O(9)    | 1.91(2)            | Cu(3)-N(7)#4  | 2.01(2)            |
| W(2)-O(11B)  | 1.90(3)            | W(4)-O(8)#1   | 1.90(2)            | W(6)-O(19)   | 1.92(2)            | Cu(3)-N(4)    | 2.01(2)            |

Symmetry transformations used to generate equivalent atoms:

#1  $-x-1, -y, -z-1$ ; #2  $-x, -y, -z$ ; #3  $-x, -y+1, -z$ ; #4  $-x-1, -y-1, -z$

**Table S3.** Selected Bond Distances for Compound 2

| Bond          | Distant (Å) | Bond          | Distant (Å) | Bond           | Distant (Å) | Bond           | Distant (Å) |
|---------------|-------------|---------------|-------------|----------------|-------------|----------------|-------------|
| P(1)-O(4)     | 1.43(1)     | Mo(3)-O(2)#1  | 2.48(1)     | Mo(7)-O(25)    | 2.46(1)     | Mo(11)-O(24)   | 2.51(1)     |
| P(1)-O(2)     | 1.54(1)     | Mo(4)-O(19)   | 1.66(1)     | Mo(8)-O(35)    | 1.65(1)     | Mo(12)-O(44)   | 1.66(1)     |
| P(1)-O(1)     | 1.57(1)     | Mo(4)-O(18)   | 1.83(1)     | Mo(8)-O(32)    | 1.83(1)     | Mo(12)-O(39)   | 1.84(1)     |
| P(1)-O(3)     | 1.58(1)     | Mo(4)-O(20)   | 1.86(1)     | Mo(8)-O(34)    | 1.86(1)     | Mo(12)-O(36)   | 1.87(1)     |
| P(2)-O(26)    | 1.50(1)     | Mo(4)-O(7B)   | 1.81(2)     | Mo(8)-O(33)    | 1.99(1)     | Mo(12)-O(42)   | 1.93(1)     |
| P(2)-O(25)    | 1.51(1)     | Mo(4)-O(17)   | 1.95(1)     | Mo(8)-O(31)    | 1.99(1)     | Mo(12)-O(29)   | 2.00(1)     |
| P(2)-O(24)    | 1.56(1)     | Mo(4)-O(7A)   | 2.18(2)     | Mo(8)-O(24)#2  | 2.42(1)     | Mo(12)-O(23)#2 | 2.40(1)     |
| P(2)-O(23)    | 1.59(1)     | Mo(4)-O(1)#1  | 2.48(1)     | Mo(8)-O(26)    | 2.52(1)     | Cu(1)-N(48)    | 1.93(1)     |
| Mo(1)-O(5)    | 1.66(1)     | Mo(4)-O(3)    | 2.49(1)     | Mo(9)-O(38)    | 1.66(1)     | Cu(1)-N(51)    | 2.08(1)     |
| Mo(1)-O(7B)   | 1.87(2)     | Mo(5)-O(21)   | 1.65(1)     | Mo(9)-O(30)    | 1.81(1)     | Cu(2)-N(57)#4  | 1.98(1)     |
| Mo(1)-O(8)    | 1.81(1)     | Mo(5)-O(6)    | 1.82(1)     | Mo(9)-O(37)    | 1.85(1)     | Cu(2)-N(36)    | 1.98(1)     |
| Mo(1)-O(9)    | 1.92(1)     | Mo(5)-O(16)   | 1.83(1)     | Mo(9)-O(36)    | 1.94(1)     | Cu(2)-N(56)    | 1.98(1)     |
| Mo(1)-O(7A)   | 1.90(1)     | Mo(5)-O(18)   | 1.99(1)     | Mo(9)-O(32)    | 2.03(1)     | Cu(2)-N(62)    | 2.02(1)     |
| Mo(1)-O(6)    | 2.01(1)     | Mo(5)-O(12)   | 2.00(1)     | Mo(9)-O(24)#2  | 2.47(1)     | Cu(2)-OW1      | 2.37(1)     |
| Mo(1)-O(1)#1  | 2.40(1)     | Mo(5)-O(1)#1  | 2.49(1)     | Mo(9)-O(25)    | 2.48(1)     | Cu(3)-N(13)#5  | 1.97(1)     |
| Mo(2)-O(10)   | 1.66(1)     | Mo(6)-O(22)   | 1.65(1)     | Mo(10)-O(41)   | 1.63(1)     | Cu(3)-N(12)    | 2.01(1)     |
| Mo(2)-O(12)   | 1.81(1)     | Mo(6)-O(14)   | 1.84(1)     | Mo(10)-O(27)   | 1.82(1)     | Cu(3)-N(18)    | 2.01(1)     |
| Mo(2)-O(13)   | 1.84(1)     | Mo(6)-O(9)#1  | 1.87(1)     | Mo(10)-O(40)   | 1.84(1)     | Cu(3)-OW2      | 2.02(1)     |
| Mo(2)-O(11)#1 | 1.97(1)     | Mo(6)-O(20)   | 1.96(1)     | Mo(10)-O(34)   | 1.96(1)     | Cu(3)-N(1)     | 2.24(1)     |
| Mo(2)-O(8)#1  | 2.02(1)     | Mo(6)-O(13)   | 1.98(1)     | Mo(10)-O(39)   | 1.98(1)     | Cu(4)-N(34)    | 2.03(1)     |
| Mo(2)-O(2)    | 2.42(1)     | Mo(6)-O(3)    | 2.37(1)     | Mo(10)-O(23)#2 | 2.44(1)     | Cu(4)-N(26)    | 2.03(1)     |
| Mo(3)-O(15)   | 1.66(1)     | Mo(7)-O(28)   | 1.65(1)     | Mo(11)-O(43)   | 1.64(1)     | Cu(4)-N(29)    | 2.04(1)     |
| Mo(3)-O(11)   | 1.83(1)     | Mo(7)-O(31)#2 | 1.82(1)     | Mo(11)-O(33)#2 | 1.83(1)     | Cu(4)-N(40)    | 2.06(1)     |
| Mo(3)-O(17)   | 1.85(1)     | Mo(7)-O(29)   | 1.82(1)     | Mo(11)-O(42)   | 1.86(1)     | Cu(4)-N(46)    | 2.21(1)     |
| Mo(3)-O(16)#1 | 1.97(1)     | Mo(7)-O(27)#2 | 1.96(1)     | Mo(11)-O(37)#2 | 1.95(1)     | Cu(5)-N(4)#6   | 1.99(1)     |
| Mo(3)-O(14)   | 1.98(1)     | Mo(7)-O(30)   | 2.01(1)     | Mo(11)-O(40)   | 1.96(1)     | Cu(5)-N(24)    | 1.99(1)     |
| Mo(3)-O(3)    | 2.47(1)     | Mo(7)-O(26)#2 | 2.46(1)     | Mo(11)-O(23)#2 | 2.48(1)     | Cu(5)-N(3)     | 1.99(1)     |
| Cu(5)-N(7)#6  | 2.05(1)     |               |             |                |             |                |             |

Symmetry transformations used to generate equivalent atoms:

#1  $-x, -y+1, -z$

#2  $-x+2, -y, -z+1$

#3  $-x+1, -y, -z$

#4  $-x, -y, -z$

#5  $-x+1, -y+1, -z+1$

#6  $-x+2, -y+1, -z+1$



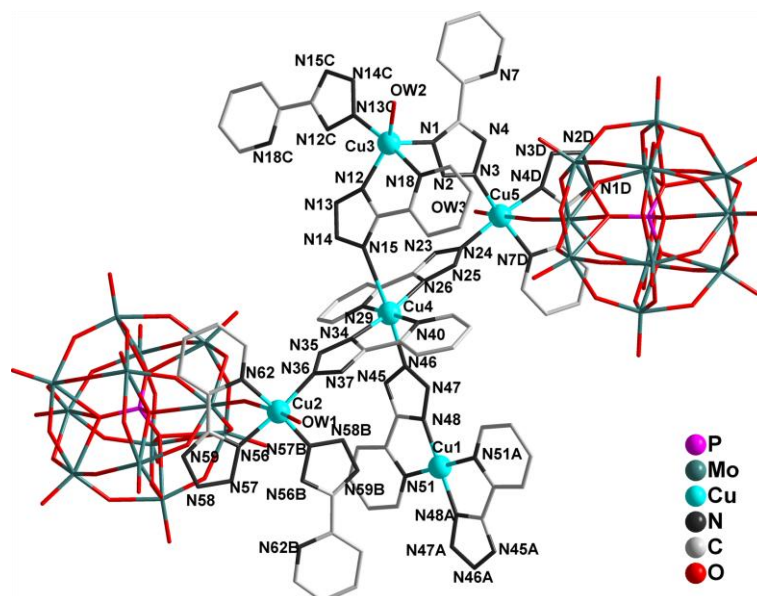

Fig. 3 The coordination environment of copper atoms in compound **2**.

The hydrogen atoms are omitted for clarity. (A: 1-x, 2-y, 1-z; B: 2-x, 2-y, 1-z; C: -x, 1-y, -z; D: 1-x, 1-y, -z)

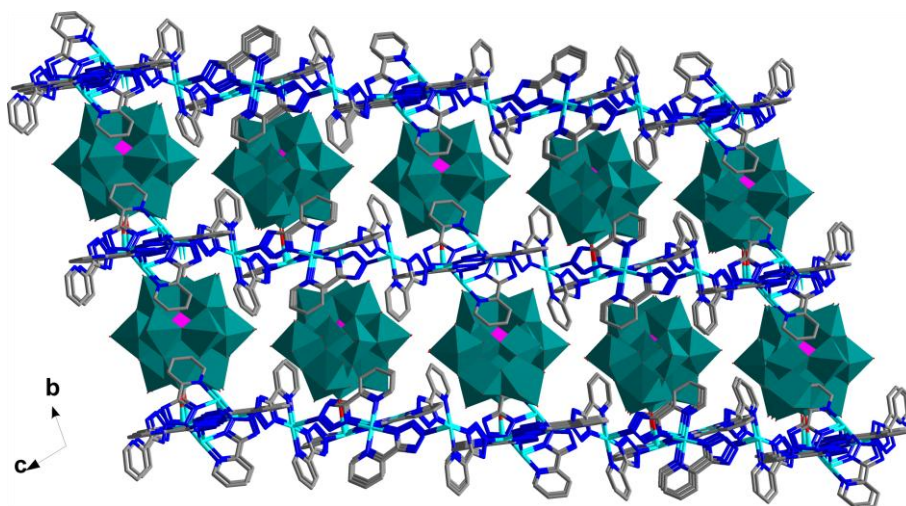

Fig. S4 The 3D framework of compound **2**.

The hydrogen atoms and lattice water molecules are omitted for clarity.

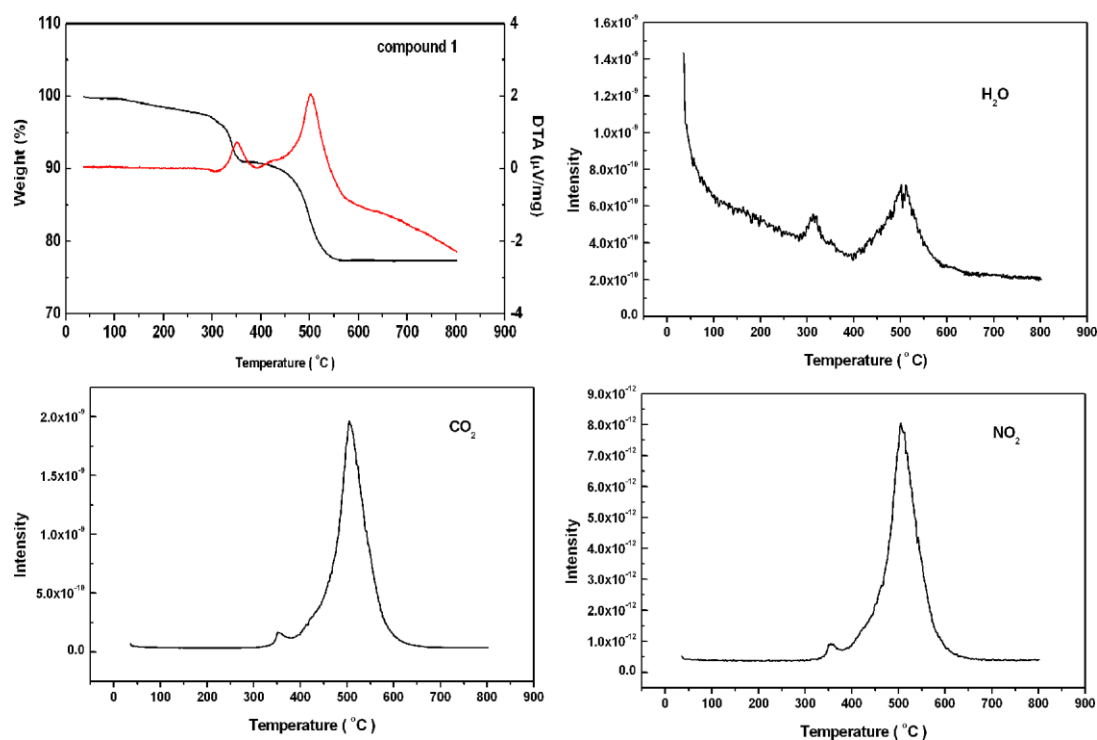

Fig. S5 TGA curves of **1** and MS curves of the decomposed products for **1**.

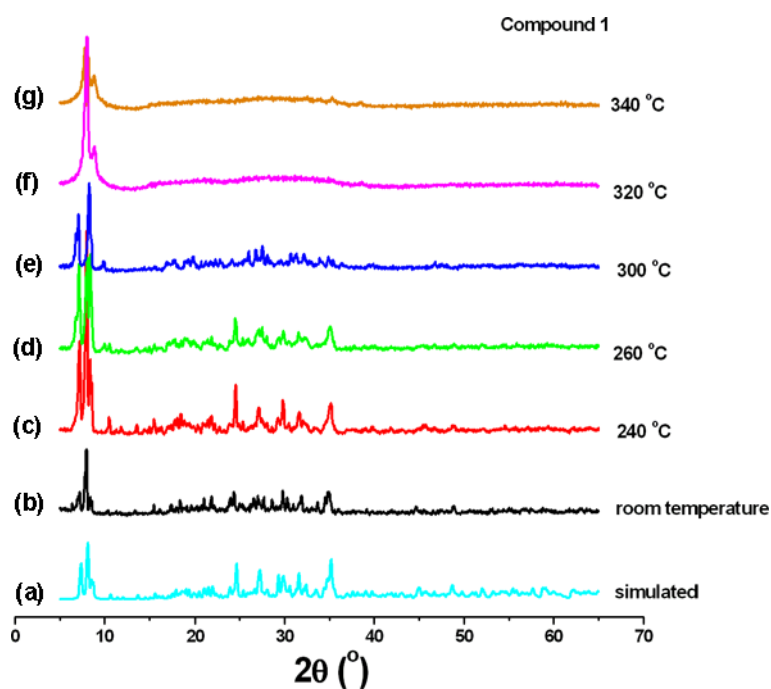

Fig. S6 XRD patterns for **1** (a) calculated on the basis of the structure determined by single-crystal XRD, (b) taken at room temperature, (c) taken after heating at 240 °C for one hour, (d) taken after heating at 260 °C for one hour, (e) taken after heating at 300 °C for one hour, (f) taken after heating at 320 °C for one hour, (g) taken after heating at 340 °C for one hour.

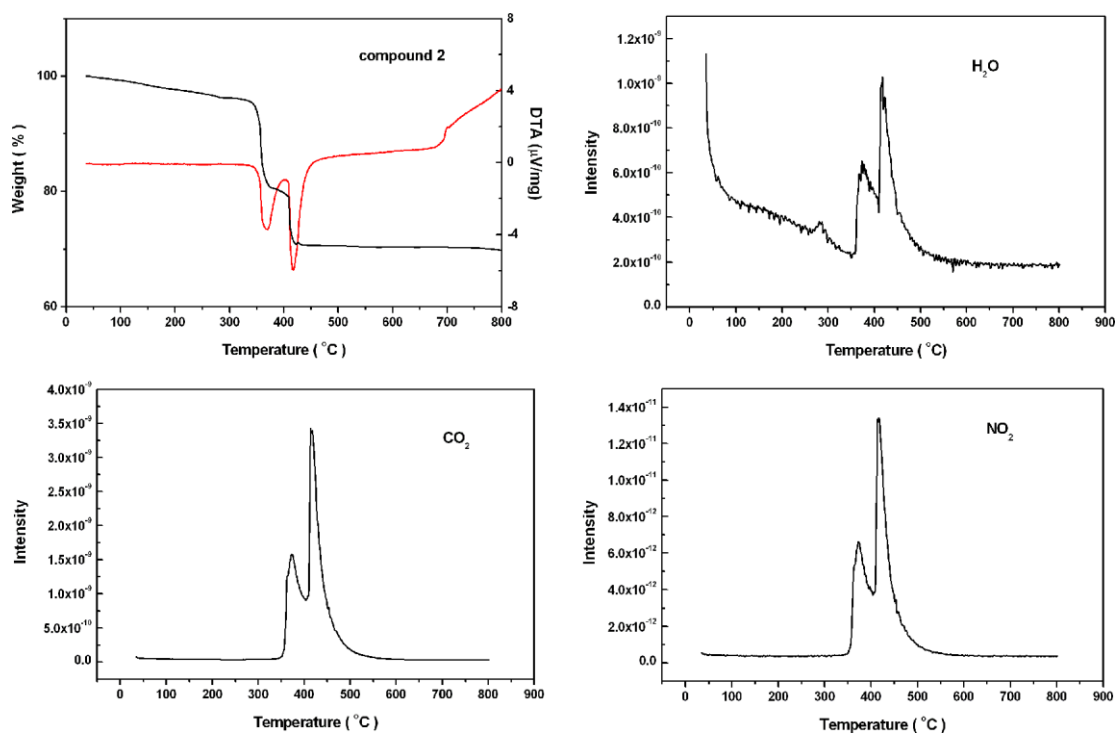

Fig. S7 TGA curves of **2** and MS curves of the decomposed products for **2**.

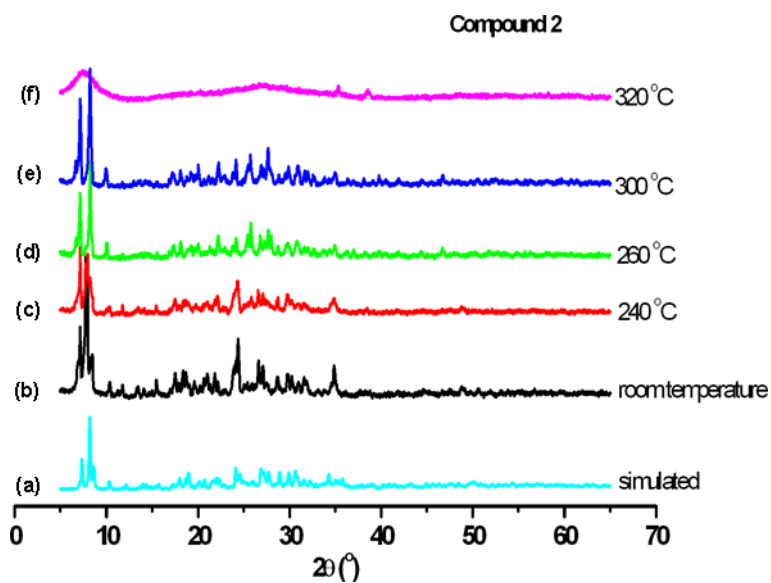

Fig. S8 XRD patterns for **2** (a) calculated on the basis of the structure determined by single-crystal XRD, (b) taken at room temperature, (c) taken after heating at 240 °C for one hour, (d) taken after heating at 260 °C for one hour, (e) taken after heating at 300 °C for one hour, (f) taken after heating at 320 °C for one hour.

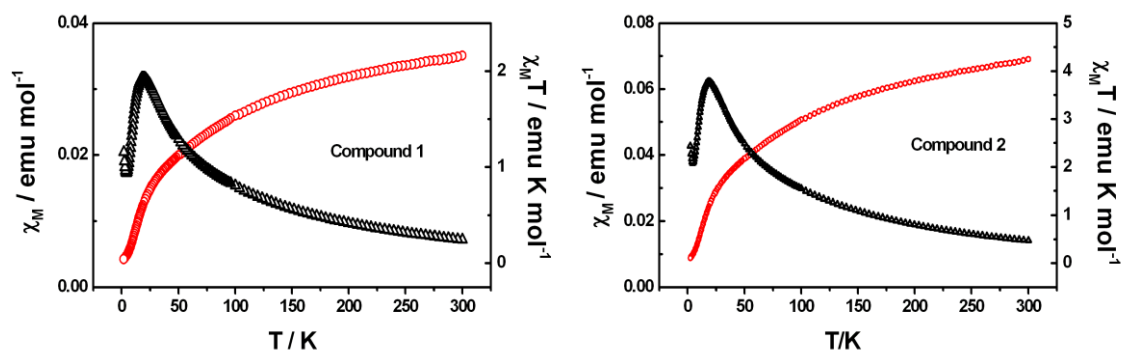

Fig. S9 Plots of the product  $\chi_M T$  vs  $T$  ( $\circ$ ) and  $\chi_M$  vs  $T$  ( $\Delta$ ) for compound **1** and **2**.
